# Supplementary material
Source: publisher site journal article supplement (https://www.spandidos-publications.com/6161/downloadSupplementary)

Figure S1. Postoperative immunohistochemistry staining. Immunohistochemistry staining showed negativity for p40 in the postoperative specimen (magnification, x100). p40, tumor protein p40.

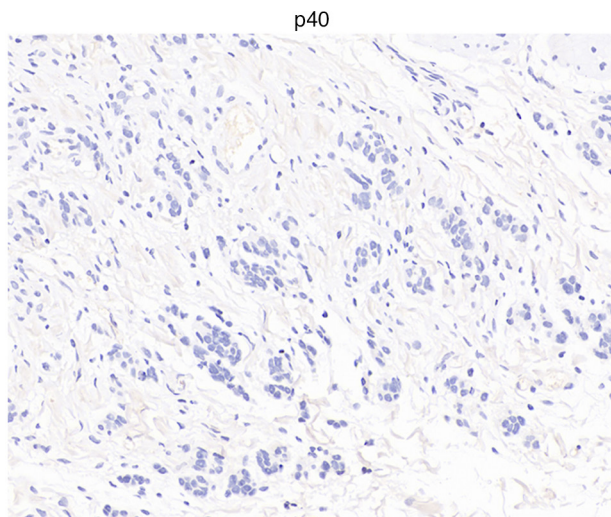

Supplement: Supplementary file 1 [file downloadSupplementary]
